# Supplementary material
Source: publisher figshare collection journal article supplement (https://gsajournals.figshare.com/ndownloader/files/13991189)
Supplement: Supplementary file 1 [file 13991189]

## Sheet: TableS18
Table S18 Summary of predicted non-coding RNAs in the M. baccata.
Type	Subtype	Copy number	Average length (bp)	Total length (bp)
tRNA	-	1553	75.358	117031
rRNA		5778	135.878	785104
	5S	413	88.571	36580
	5.8S	272	104.522	28430
	18S	4116	153.643	632396
	28S	977	89.763	87698
snRNA		497	119.746	59514
	CD-box	291	103.038	29984
	HACA-box	42	115.048	4832
	splicing	164	150.598	24698
